# Supplementary material for: Development of tissue paper-based chemosensor and demonstration for the selective detection of Cu2+ and Hg2+ ions
Source: Royal Society of Chemistry journal article supplement (doi:10.1039/d3ra03764a), 2023-01-01
Supplement: d3ra03764a1.pdf [file d3ra03764a1.pdf]

## **Supplementary Information**

### **Development of low-cost tissue paper-based chemosensor and demonstration for selective detection of Cu<sup>2+</sup> and Hg<sup>2+</sup> ions**

Bharathkumar Thangaraj,<sup>a</sup> Marimuthu Ponram,<sup>a</sup> Suresh Ranganathan,<sup>b,c</sup> Sambath Baskaran,<sup>d</sup> Ravichandran Cingaram,<sup>a</sup> Sathiyarayanan Kulathu Iyer,<sup>e</sup> and Karthikeyan Natesan Sundaramurthy\*<sup>a</sup>

<sup>a</sup>Department of Chemistry, Easwari Engineering College, Chennai 600 089, India.

<sup>b</sup>Centre for Material Chemistry, Karpagam Academy of Higher Education, Coimbatore, India.

<sup>c</sup>Department of Chemistry, Karpagam Academy of Higher Education, Coimbatore, India.

<sup>d</sup>Department of Materials Science and Engineering, Korea Advanced Institute of Science and Technology (KAIST), Daejeon 34141, Republic of Korea.

<sup>e</sup>School of Advanced Sciences, Vellore Institute of Technology (VIT), Vellore 632 014, India.

\*Corresponding author: Email id: [karthikeyan.ns12@gmail.com](mailto:karthikeyan.ns12@gmail.com)

## Table of CONTENTS

**Fig. S1.** The  $^1\text{H}$  NMR spectra of **intermediate 1**

**Fig. S2.** The  $^{13}\text{C}$  NMR spectra of **intermediate 1**

**Fig. S3.** The HR-MS spectra of **intermediate 1**

**Fig. S4.** The  $^1\text{H}$ NMR spectra of **DPICDT**

**Fig. S5.** The  $^{13}\text{C}$ NMR spectra of **DPICDT**

**Fig. S6.** The HR-MS spectra of **DPICDT**

**Fig. S7.** Changes in fluorescence intensity of **DPICDT** in THF on the addition of DMSO.

**Fig. S8.** Job's plot for **DPICDT** Vs  $\text{Cu}^{2+}$  and  $\text{Hg}^{2+}$  in  $\text{CH}_3\text{CN}:\text{H}_2\text{O}$  (8:2, v/v)

**Fig. S9.** The HR-MS spectra of **DPICDT-Cu<sup>2+</sup>**

**Fig. S10.** The HR-MS spectra of **DPICDT-Hg<sup>2+</sup>**

**Fig. S11.** B–H plot of the 1: 1 complex of probe **DPICDT** with  $\text{Cu}^{2+}$  and  $\text{Hg}^{2+}$  ions

**Fig. S12.** Linear plot of fluorescence intensity versus concentration of  $\text{Cu}^{2+}$  and  $\text{Hg}^{2+}$  ions

**Fig. S13.** FT-IR spectra of probe **DPICDT**, **DPICDT-Cu<sup>2+</sup>** and **DPICDT-Hg<sup>2+</sup> (ClO<sub>4</sub>)<sub>2</sub><sup>-</sup>**.

**Fig. S14.** AAS spectrum of **DPICDT** with  $\text{Cu}^{2+}$  and  $\text{Hg}^{2+}$

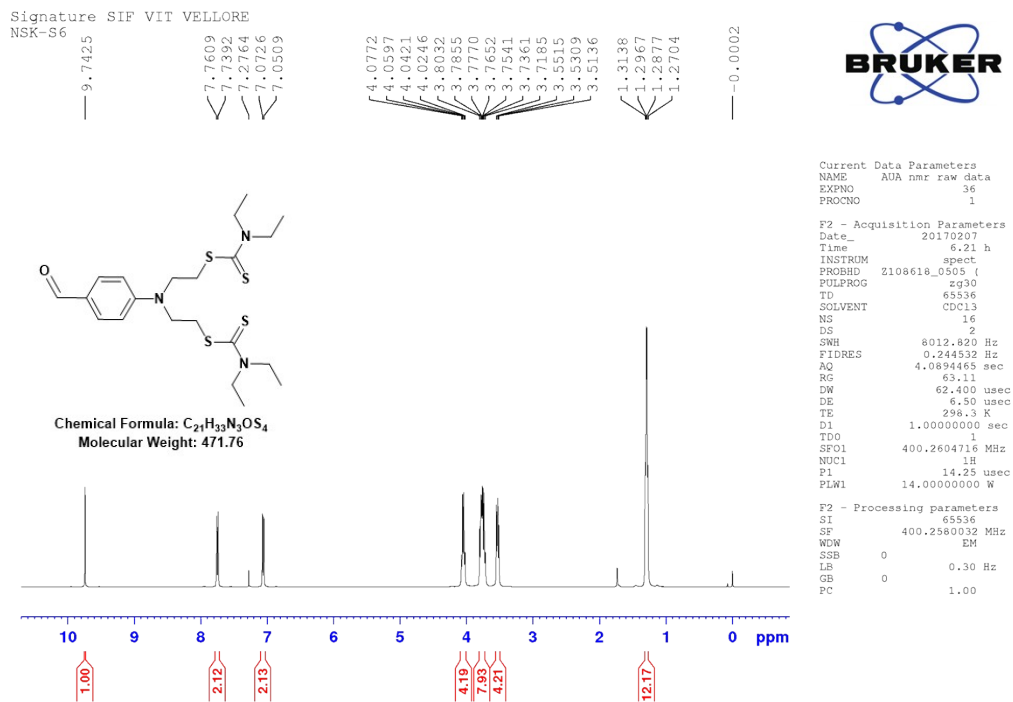

Fig.S1. The  $^1\text{H}$  NMR spectra of intermediate 1

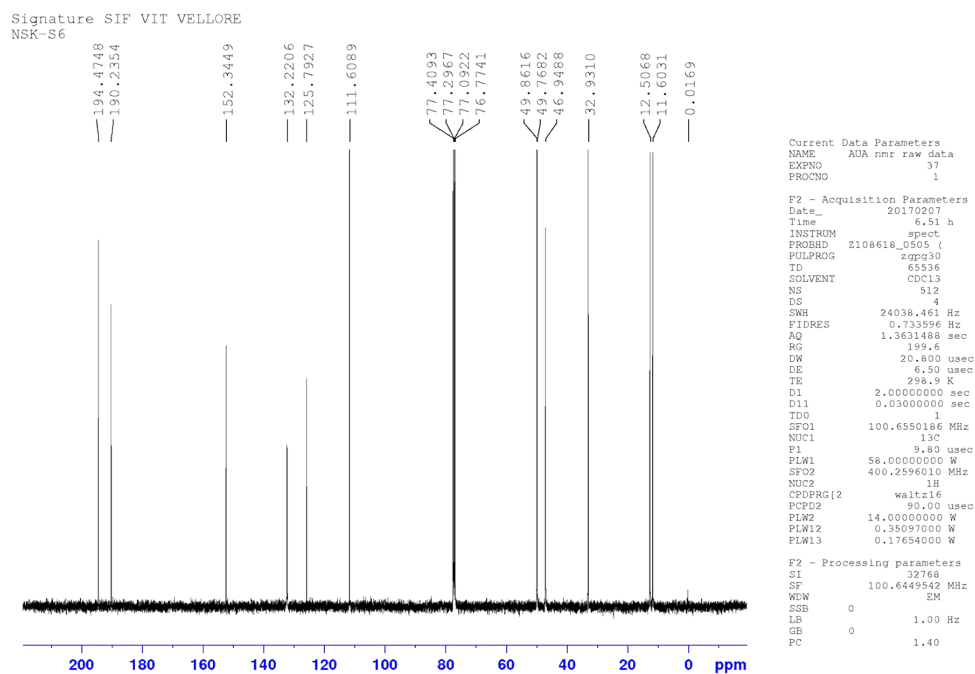

Fig.S2. The  $^{13}\text{C}$  NMR spectra of intermediate 1

## Spectra

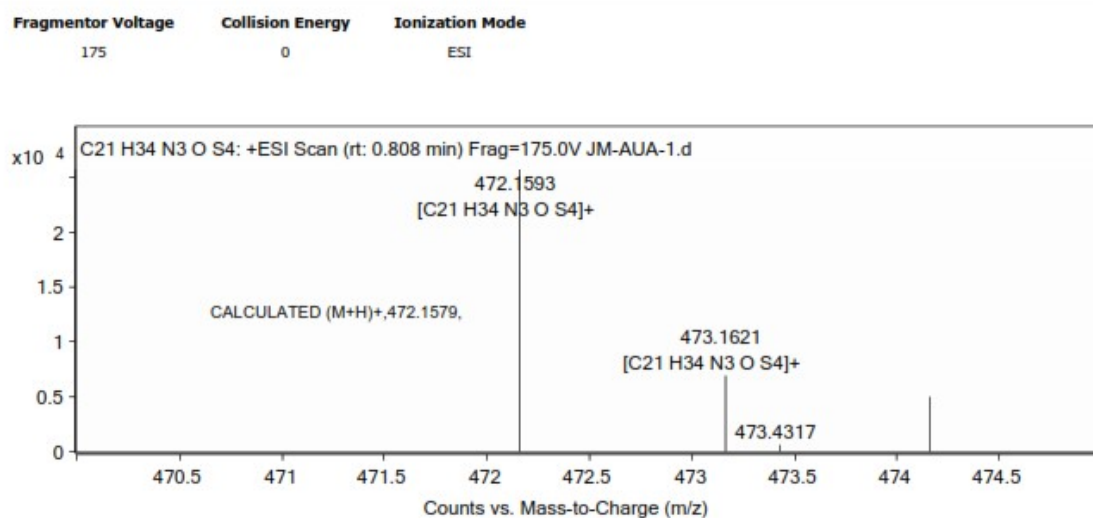

Fig.S3. The HR-MS spectra of intermediate 1.

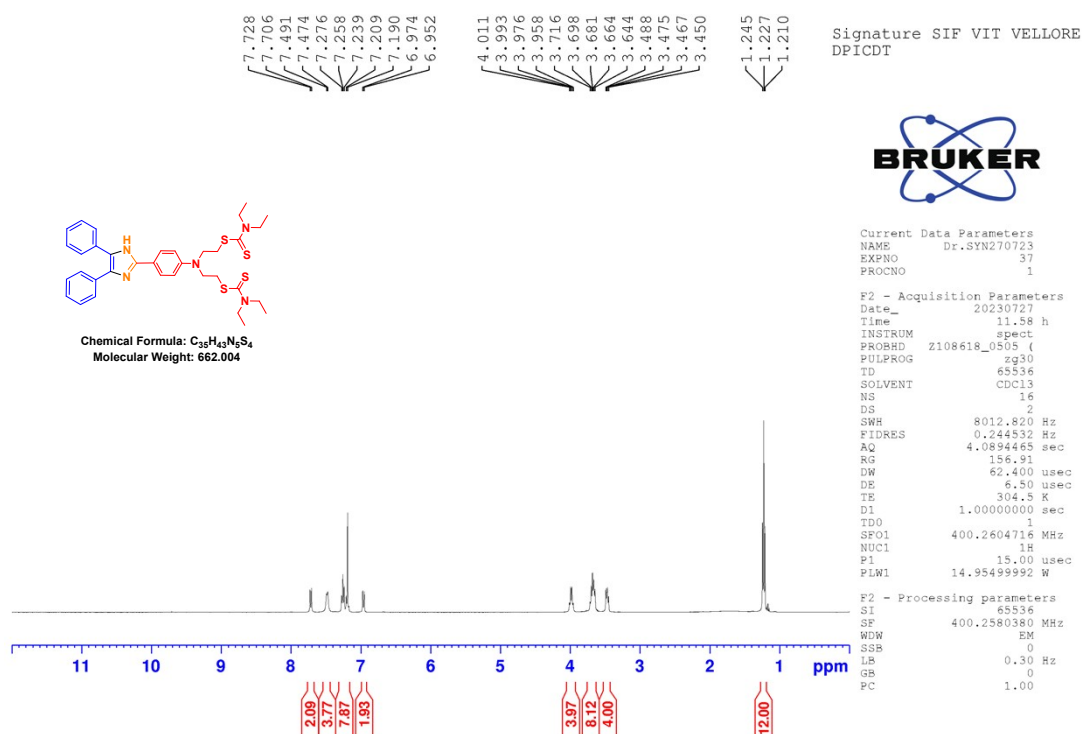

Fig.S4. The  $^1\text{H}$ NMR spectra of DPICDT.

Signature SIF VIT VELLORE  
BEN

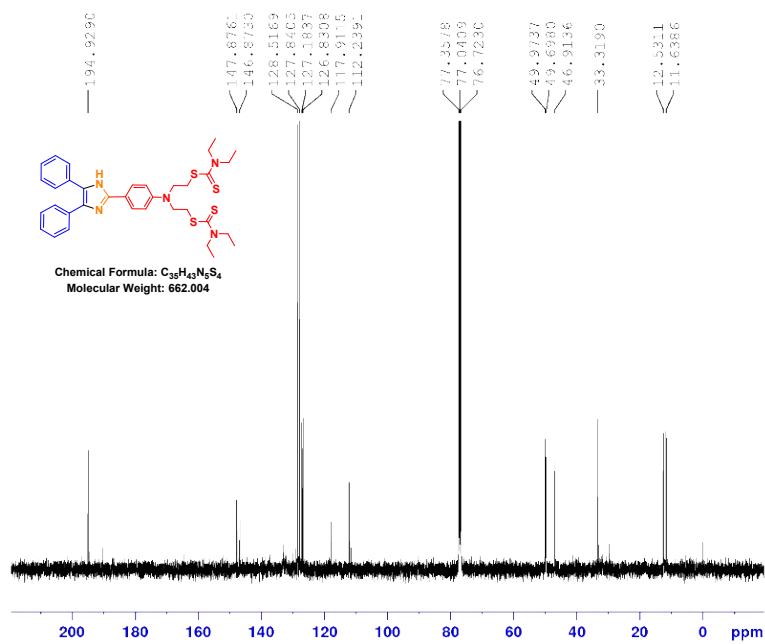

Fig.S5. The  $^{13}C$  NMR spectra of DPICDT.

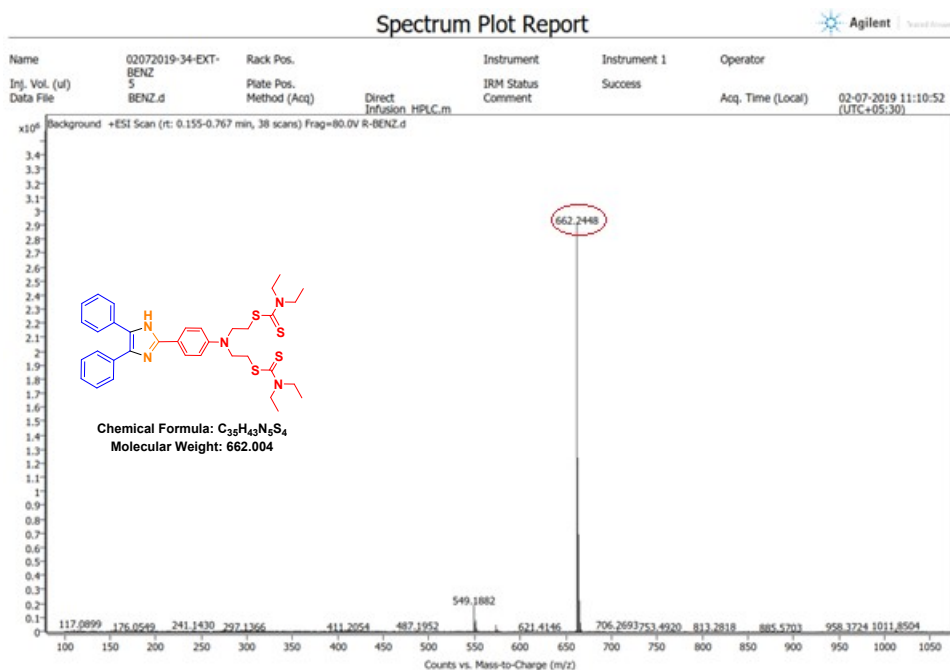

Fig.S6. The HR-MS spectra of DPICDT.

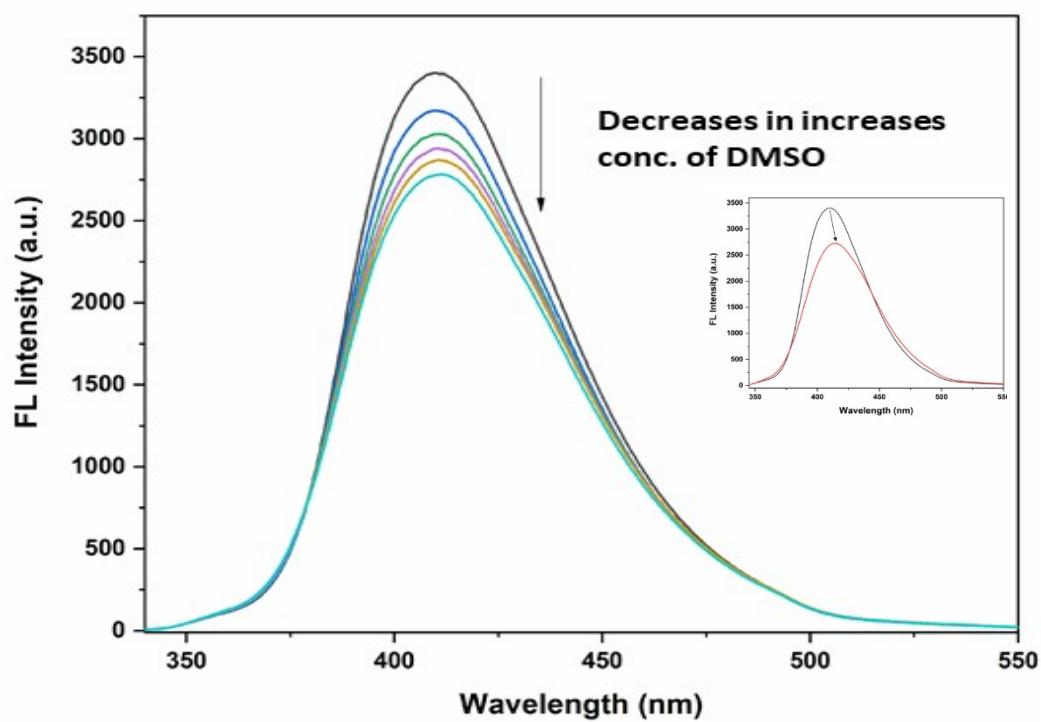

Fig.S7. Changes in fluorescence intensity of DPICDT in THF on the addition of DMSO.

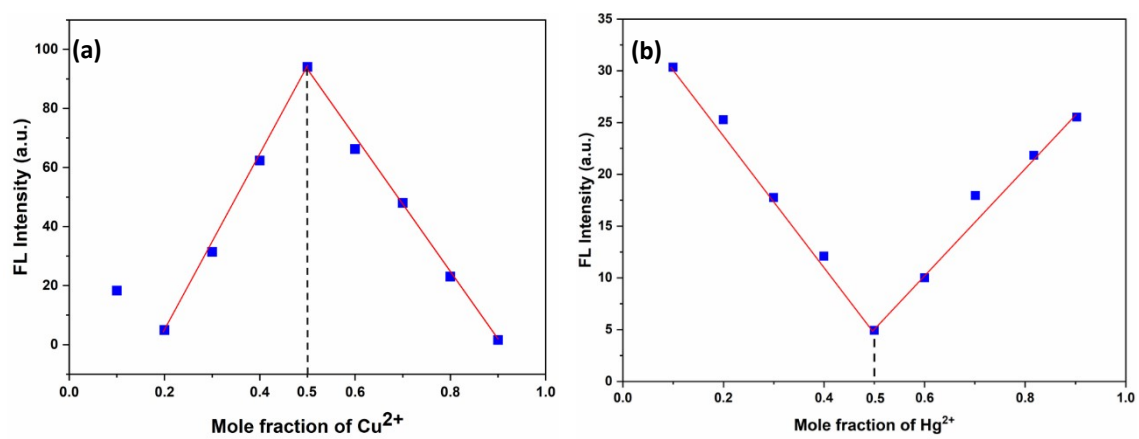

Fig. S8. Job's plot for DPICDT Vs  $\text{Cu}^{2+}$  (a) and DPICDT Vs  $\text{Hg}^{2+}$  (b) in  $\text{CH}_3\text{CN}:\text{H}_2\text{O}$  (8:2, v/v).

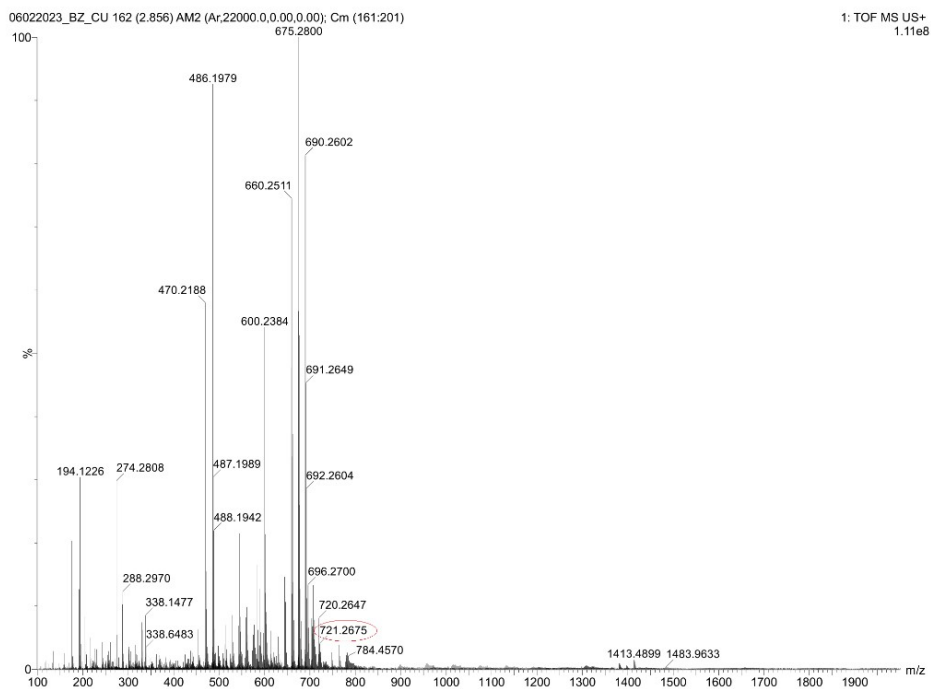

**Fig.S9.** The HR-MS spectra of DPICDT-Cu<sup>2+</sup>

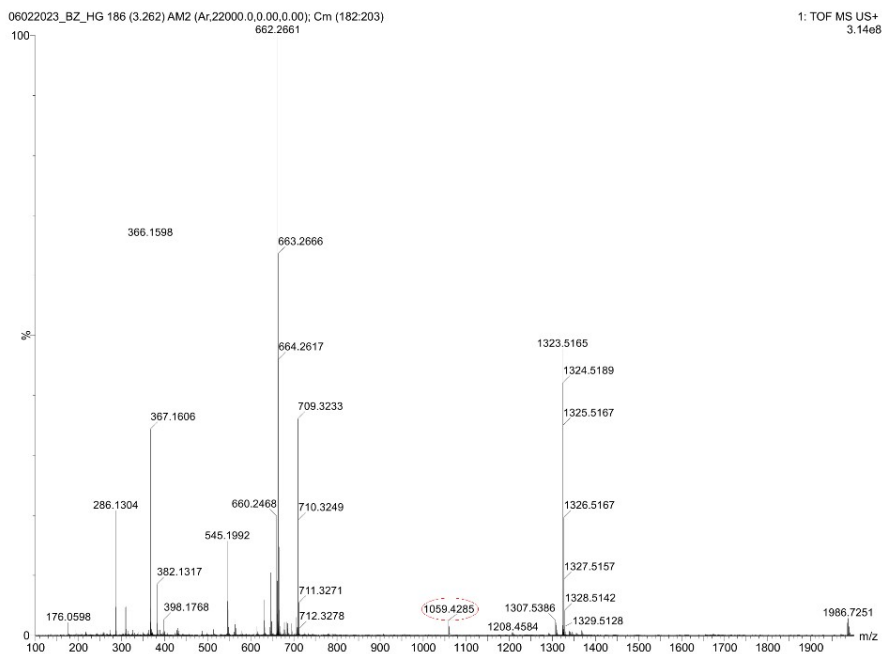

**Fig.S10.** The HR-MS spectra of DPICDT-Hg<sup>2+</sup>

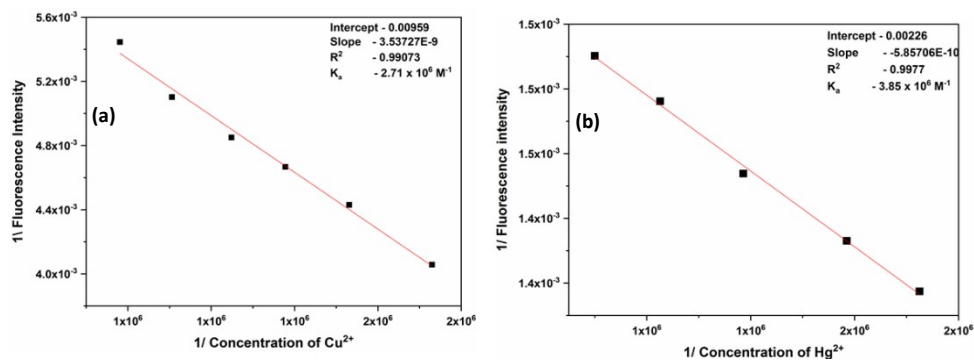

**Fig. S11.** (a) B–H plot of the 1: 1 complex of probe DPICDT and  $\text{Cu}^{2+}$  ions (b) B–H plot of the 1: 1 complex of probe DPICDT and  $\text{Hg}^{2+}$  ions.

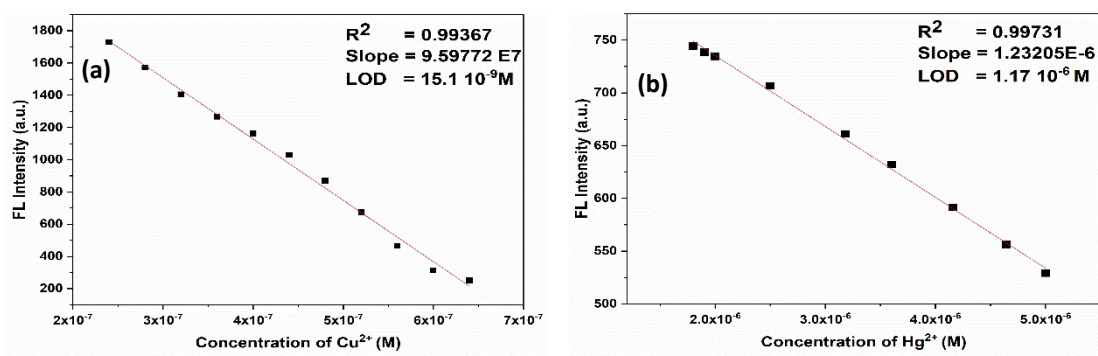

**Fig. S12.** (a) Linear plot of fluorescence intensity versus concentration of  $\text{Cu}^{2+}$  ions (b) Linear plot of fluorescence intensity versus concentration of  $\text{Hg}^{2+}$  ions



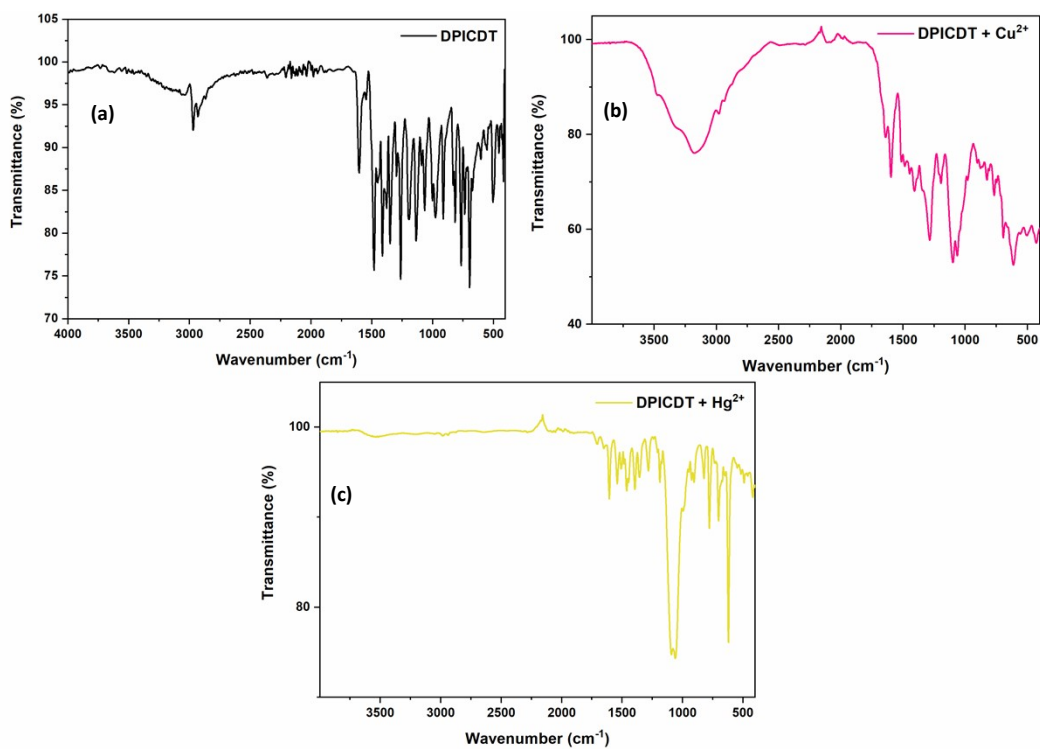

Fig. S13. (a) FT-IR spectra of probe DPICDT (b) DPICDT + Cu<sup>2+</sup> (c) DPICDT + Hg<sup>2+</sup>

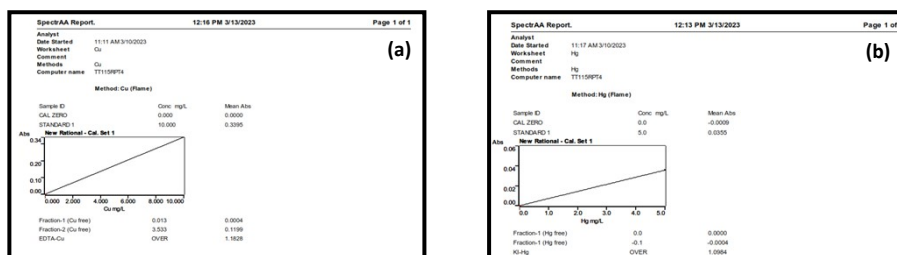

Fig. S14. (a) AAS spectrum calibration plot of the DPICDT with Cu<sup>2+</sup> (b) DPICDT with Hg<sup>2+</sup>

**Table-S1****Recent literature reports on copper.**

| S.No | Various substituted core                  | LOD            | Solvent system used                                    | Reversibility | Paper strip studies | Metal extraction | Ref. |
|------|-------------------------------------------|----------------|--------------------------------------------------------|---------------|---------------------|------------------|------|
| 1    | Schiff-base-based sensor                  | 0.62 $\mu$ M   | 50% ethanol/tris-HCl buffer solution (pH = 7.40)       | Done          | Done                | -                | 1    |
| 2    | Naphthaldehyde-pyridoxal based sensor     | 32.9 nM        | DMSO/HEPES (pH = 7.40)                                 | Done          | Done                | -                | 2    |
| 3    | Pyridine-2,6-dicarboxamide-based sensor   | 1.49 $\mu$ M   | Pure CH <sub>3</sub> CN                                | Done          | -                   | -                | 3    |
| 4    | Diaminebenzene-based sensor               | 15 nM          | Pure CH <sub>3</sub> CN                                | -             | -                   | -                | 4    |
| 5    | 1,5-Dihydroxyanthraquinone-based sensor   | 10 nM          | Ethanol                                                | Done          | -                   | -                | 5    |
| 6    | Schiffbase-based sensor                   | 1.8 $\mu$ M    | Methanol - tris-HCl buffer                             | Done          | -                   | -                | 6    |
| 7    | 1,8-naphthalimide sensor                  | 17 nM          | (CH <sub>3</sub> CN: H <sub>2</sub> O) (9.7:0.3) (v\v) | -             | -                   | -                | 7    |
| 8    | Triphenylamine benzothiazole-based sensor | 0.45 $\mu$ M   | Pure CH <sub>3</sub> CN                                | -             | Done                | -                | 8    |
| 9    | <b>DPICDT (Present work)</b>              | <b>15.1 nM</b> | <b>(CH<sub>3</sub>CN: H<sub>2</sub>O) (8:2) (v\v)</b>  | <b>Done</b>   | <b>Done</b>         | <b>Done</b>      |      |

Table-S2

## Recent literature reports of mercury.

| S.No | Various substituted core                | LOD                           | Solvent system used                                             | Reversibility | Paper strip studies | Extraction of metals | Ref. |
|------|-----------------------------------------|-------------------------------|-----------------------------------------------------------------|---------------|---------------------|----------------------|------|
| 1    | Naphthalene based sensor                | 4.92 $\mu$ M                  | DMSO/buffer (99/1, v/v)                                         | -             | -                   | -                    | 9    |
| 2    | Chitosan-BODIPY-based sensor            | 1.51 $\mu$ M                  | Aqueous acetic acid                                             | -             | -                   | -                    | 10   |
| 3    | Rhodamine-based sensor                  | 3.36 $\mu$ M                  | CH <sub>3</sub> CN/H <sub>2</sub> O (v/v:9/1 with HEPES buffer) | -             | -                   | -                    | 11   |
| 4    | Dipicolylaminoquinoline based sensor    | 1.01 $\mu$ M                  | NaOAc-AcOH buffer pH = 5.9                                      | Done          | -                   | -                    | 12   |
| 5    | Squaraine-bis(Rhodamine-B)-based sensor | 6.48 $\mu$ M                  | CH <sub>3</sub> CN                                              | Done          | -                   | -                    | 13   |
| 6    | Naphthalimide based sensor              | 2.0 $\mu$ M                   | Tris-HCl buffer (ethanol/water = 1:1, v/v, pH 7.01)             | Done          | -                   | -                    | 14   |
| 7    | <b>DPICDT (Present work)</b>            | <b>1.17 <math>\mu</math>M</b> | <b>(CH<sub>3</sub>CN: H<sub>2</sub>O) (8:2) (v\ v)</b>          | <b>Done</b>   | <b>Done</b>         | <b>Done</b>          |      |

## References

- 1 H. Liu, S. Ding, Q. Lu, Y. Jian, G. Wei and Z. Yuan, 2022, ACS omega, 7, 7585-7594.
- 2 V. Bhardwaj, S.A. Kumar and S.K. Sahoo, 2022, Microchem. J., 178,107404.
- 3 H. Rahimi, R. Hosseinzadeh and M. Tajbakhsh, 2022, J. Photochem. Photobiol. A, 407, 113049.
- 4 A. Kuwar, R. Patil, A. Singh, S.K. Sahoo, J. Marek and N. Singh, 2015, J. Mater. Chem. C., 3, 453-460.
- 5 S. Mohandoss, J. Sivakamavalli, B. Vaseeharan and T. Stalin, 2016, Sens. Actuators B Chem., 234, 300-315.
- 6 A.K. Manna, M. Sahu, K. Rout, U.K. Das and G.K. Patra, 2020, Microchem. J., 157, 104860.
- 7 S.N.K. Elmas, F.N. Arslan and D. Aydin, 2022, Analyst., 147, 2687-2695.
- 8 D. Li, A. Liu, Y. Xing, Z. Li, Y. Luo, S. Zhao, L. Dong, T. Xie, K. Guo and J. Li, 2023, Dyes Pigm., 213, 111180.
- 9 H. Kim, M. Lee, J.J. Lee, E.K. Min, K.T. Kim and C. Kim, 2022, J. Photochem. Photobiol. A., 428, 113882.
- 10 D. Wang, L. Marin and X. Cheng, 2022 Int. J. Biol. Macromol., 198, 194-203.
- 11 S. Bayindir, 2019, J. Photochem. Photobiol. A, 372, 235-244.
- 12 W. Paisuwan, P. Rashatasakhon, V. Ruangpornvisuti, M. Sukwattanasinitt, and A. Ajavakom, 2019, Sens. Bio-Sens., 24, 100283.
- 13 S. Lee, B.A. Rao and Y.A. Son, 2015, Sens. Actuators B Chem., 210, 519-532.
- 14 X.F. Wu, Q.J. Ma, X.J. Wei, Y.M. Hou and X. Zhu, 2013, Sens. Actuators B Chem., 183, 565-573.
